# Supplementary material for: Effect propagation after silver nanoparticle exposure in zebrafish (Danio rerio) embryos: a correlation to internal concentration and distribution patterns
Source: Royal Society of Chemistry journal article supplement (doi:10.1039/c5en00118h), 2015-01-01
Supplement: c5en00118h1.pdf [file c5en00118h1.pdf]

## Electronic Supplementary Information

### **Effect propagation after silver nanoparticle exposure in zebrafish (*Danio rerio*) embryos: a correlation to internal concentration and distribution patterns**

Steffi Böhme<sup>1</sup>, Hans-Joachim Stärk<sup>2</sup>, Thorsten Reemtsma<sup>2</sup>, Dana Kühnel<sup>1\*</sup>

<sup>1</sup> Helmholtz Centre for Environmental Research - UFZ, Department of Bioanalytical Ecotoxicology, Permoserstrasse 15, 04318 Leipzig (Germany)

<sup>2</sup> Helmholtz Centre for Environmental Research - UFZ, Department of Analytical Chemistry, Permoserstrasse 15, 04318 Leipzig (Germany)

\* Correspondence: [dana.kuehnel@ufz.de](mailto:dana.kuehnel@ufz.de)

Keywords: ICP-MS, Dose-response relationship, visualisation, toxicity

## Results and Discussion

### Toxicity assessment and correction to real exposure concentrations

The following steps were performed for a complete toxicity assessment: (1) ZFE toxicity testing of AgNPs and AgNO<sub>3</sub> according to the OECD test guideline 236, (2) correction of calculated dose-response curves and the LC<sub>50</sub>-values using measured, real silver concentrations, and (3) comparison of the obtained results based on nominal and corrected exposure concentrations. The corrected compared to the nominal effect concentrations after 48 h of exposure were shown in **Fig. S1**. A concentration-dependent toxicity was observed for AgNP and AgNO<sub>3</sub> treated ZFEs.

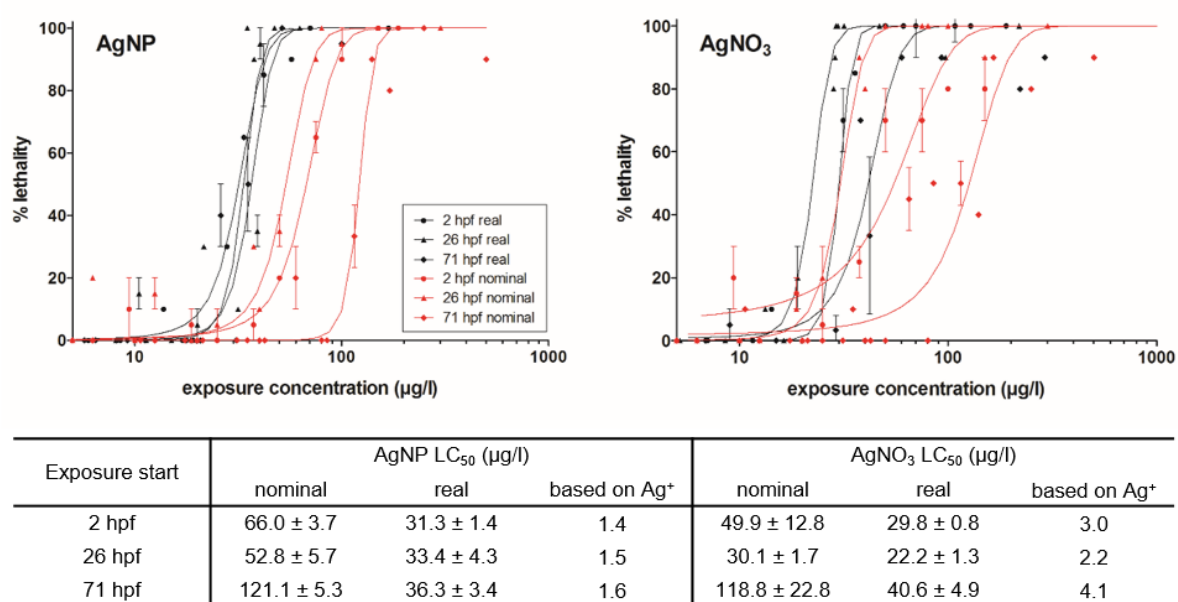

**Fig. S1:** Dose-response curves based on nominal (red) and corrected real exposure concentrations (black) for the respective developmental stages of the ZFE. The calculated nominal and real LC<sub>50</sub> values of the respective AgNP or AgNO<sub>3</sub> exposure as well as the developmental stage are listed in the table below. The LC<sub>50</sub> values based on the dissolved Ag<sup>+</sup> were calculated according to the ionic silver content in the exposure solution.
